# Supplementary material for: Employing aqueous CdTe quantum dots with diversified surface functionalities to discriminate between heme (Fe(ii)) and hemin (Fe(iii))
Source: Royal Society of Chemistry journal article supplement (doi:10.1039/c3an00310h), 2013-01-01
Supplement: c3an00310h.pdf [file c3an00310h.pdf]

## Supporting Information:

### **Employing the Aqueous CdTe Quantum Dots with Diversified Surface Functionalities to Discriminate Heme (Fe(II)) and Hemin (Fe(III))**

*Jishu Han,<sup>a</sup> Ziwei Zhou,<sup>a</sup> Xinyuan Bu,<sup>a</sup> Shoujun Zhu,<sup>a</sup> Hao Zhang,<sup>\*a</sup> Haizhu Sun,<sup>\*b</sup> and Bai Yang<sup>a</sup>*

*<sup>a</sup> State Key Laboratory of Supramolecular Structure and Materials, College of Chemistry, Jilin University, Changchun 130012, P. R. China. E-mail: hao\_zhang@jlu.edu.cn; Fax: (+86) 431-85193423; Tel: (+86) 431-85159205*

*<sup>b</sup> College of Chemistry, Northeast Normal University, Changchun 130024, P. R. China. E-mail: sunhz335@nenu.edu.cn*

**Fig. S1** pH effect on the relative PL intensity ( $I/I_0$ ) of MPA- (a), TGA- (b), and TG- (c) stabilized CdTe QDs in the presence of heme (black) or hemin (red). The concentration of CdTe QDs is 0.125 mM, referring to  $[Cd^{2+}]$ . The concentration of heme/hemin is 12.5  $\mu$ M.

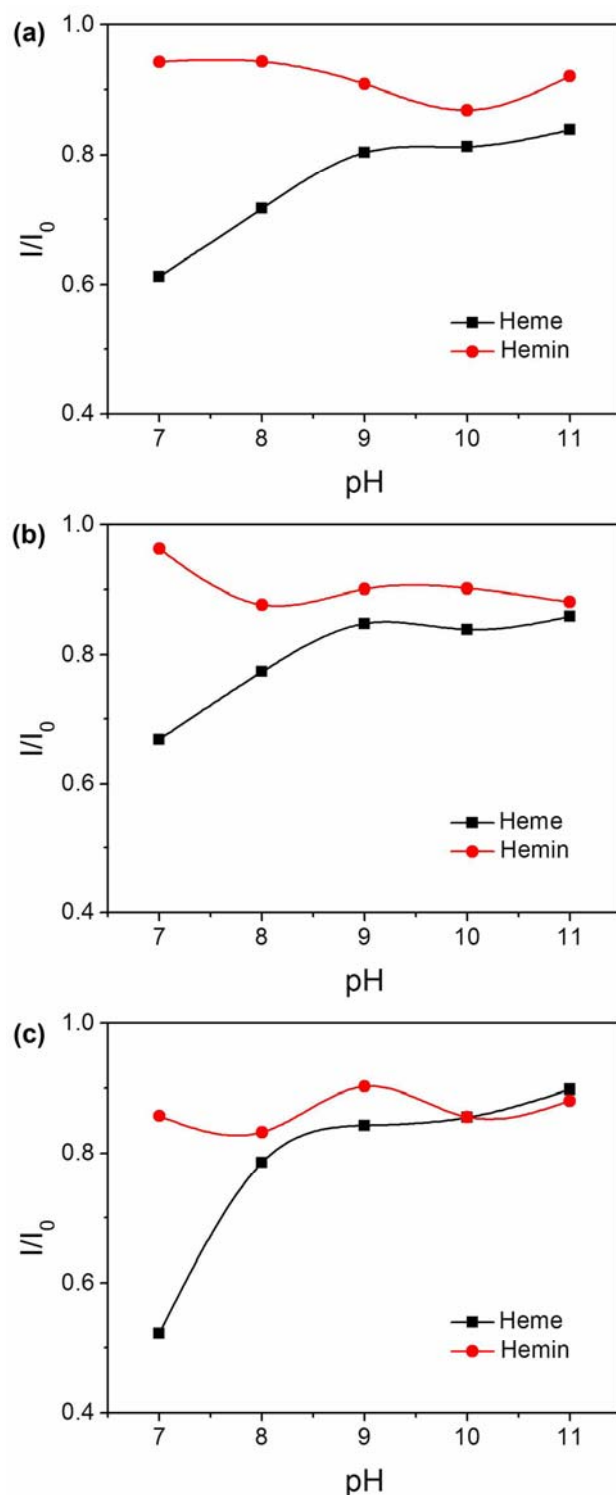

In general, with decreasing the pH, the  $I/I_0$  in the presence of heme decreases gradually, whereas it increases for hemin. This result further confirms our consideration that the QD-carboxylate repulsion is dominant for the primary adsorption of heme/hemin and therefore the discrimination through PL quenching. In

this context, the lowered pH reduces the negative charges of both QDs and heme/hemin by carboxylate deprotonation, thus facilitating the adsorption of heme/hemin with QDs. Because heme and hemin possess different net charges, as discussed in the main text (Page 4 Line 25-36), they lead to the observed response of QD PL. In addition, the colloidal stability of QDs is worse at lower pH. Consequently, the optimum pH of 9.3 is adopted in our investigations.

**Fig. S2** Relative PL intensity ( $I/I_0$ ) of MPA- (a, b), TGA- (c, d), and TG- (e, f) stabilized CdTe QDs as a function of heme and hemin. The corresponding PL spectra of CdTe QDs are indicated in Fig. 3.

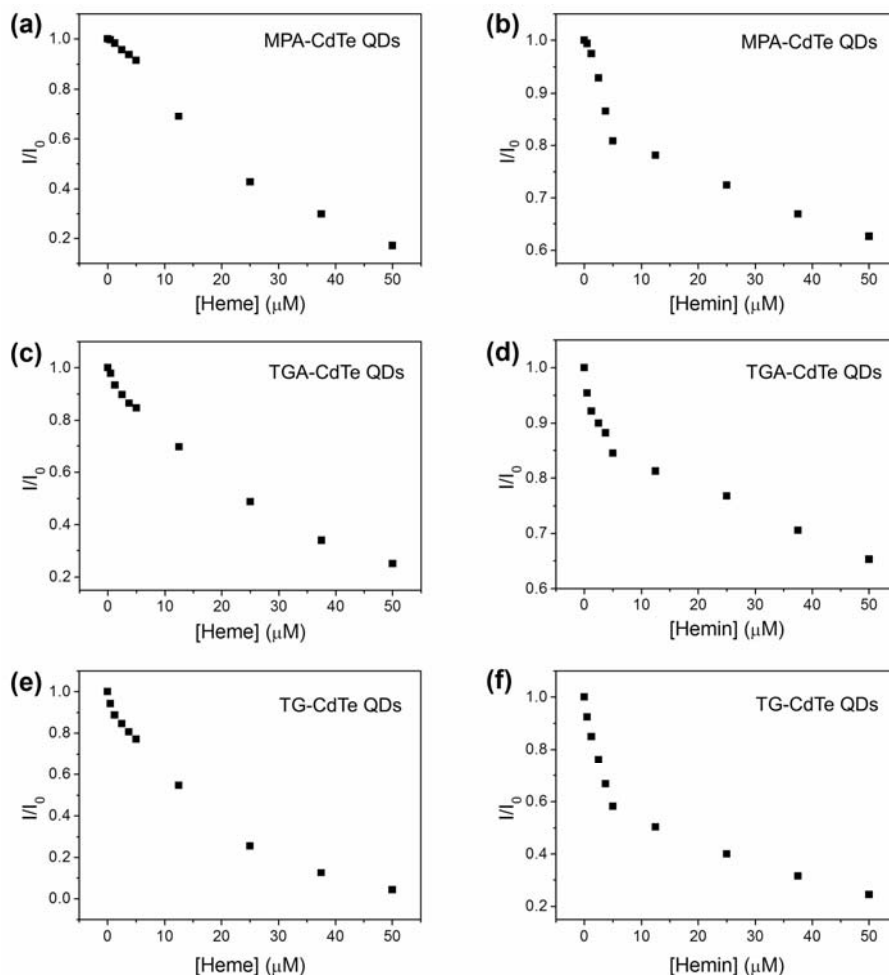

The limit of detection of Fig. 6 is evaluated using  $3\sigma/S$ , where  $\sigma$  is the standard deviation of the blank signal and the  $S$  is the slope of the calibration plot.

- Fig. 6a,  $4.4 \times 10^{-7}$  M;
- Fig. 6b,  $4.3 \times 10^{-7}$  M;
- Fig. 6c,  $1.9 \times 10^{-7}$  M;
- Fig. 6d,  $1.8 \times 10^{-7}$  M;
- Fig. 6e,  $2.5 \times 10^{-7}$  M;
- Fig. 6f,  $5.7 \times 10^{-7}$  M;
- Fig. 6g,  $2.8 \times 10^{-7}$  M;
- Fig. 6h,  $1.8 \times 10^{-6}$  M;
- Fig. 6i,  $9.5 \times 10^{-8}$  M;
- Fig. 6j,  $1.0 \times 10^{-6}$  M;
